# Supplementary material
Source: PubMed Central journal article supplement (PMC3285063)
Supplement: tjp0590-0259-SD1.pdf [file tjp0590-0259-SD1.pdf]

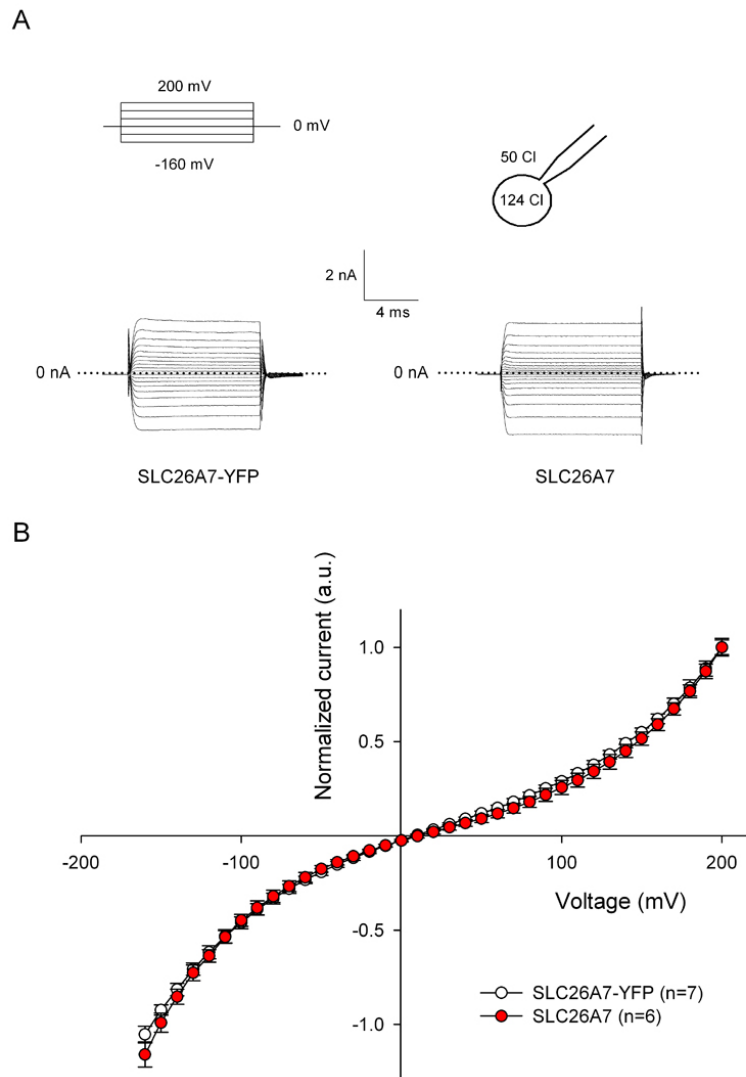

**Supplemental Figure 1**

**Supplementary Figure 1. YFP-labeled and unlabeled hSLC26A7 are functionally indistinguishable.**

A, Representative whole-cell currents in HEK293T cells transiently expressing hSLC26A7-YFP (left) or hSLC26A7 (right) with Cl<sup>-</sup> as main intra- and extracellular anion. Anion compositions are given by the cartoon. B, Normalized current-voltages relationships for SLC26A7-YFP (●) or hSLC26A7 (○). Currents were normalized to the amplitude determined at + 200 mV at the same cell. Data are shown as means ± SEM, n = (7, 6).
